# Supplementary material
Source: PubMed Central journal article supplement (PMC3789619)
Supplement: NIHMS515250-supplement-1_si_001.pdf [file NIHMS515250-supplement-1_si_001.pdf]

# Capture and printing of fixed stromal cell membranes for bioactive display on PDMS surfaces

Jungwoo Lee<sup>1</sup>, Jennifer B. Wang<sup>1</sup>, Francesca Bersani<sup>2</sup>, Biju Parekkadan<sup>1,3\*</sup>

<sup>1</sup> Department of Surgery, Center for Engineering in Medicine and Surgical Services, Massachusetts General Hospital, Harvard Medical School and Shriners Hospitals for Children in Boston, MA, 02114, USA

<sup>2</sup> Cancer Center, Massachusetts General Hospital, Harvard Medical School, Charlestown MA, 02129, USA

<sup>3</sup> Harvard Stem Cell Institute, Boston, MA, 02155, USA

## Supporting Information

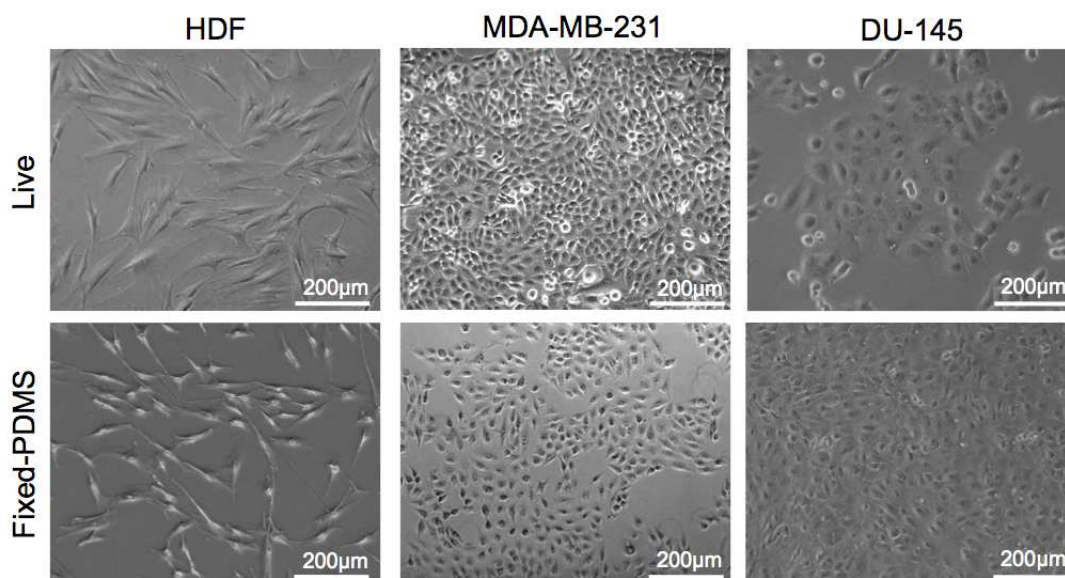

**Supporting Figure 1.** Morphological comparison fixed-PDMS transferred human dermal fibroblasts, MDA-MB-231 breast cancer cells and DU-145 prostate cancer cells under optical microscope.

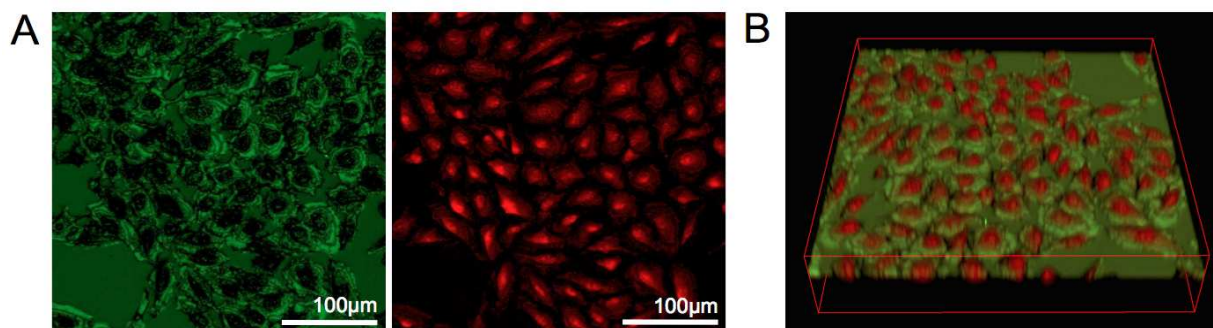

**Supporting Figure 2. (A)** Autofluorescent confocal images of remnant MDA-MB-231 cellular bodies on a tissue culture substrate after cell-PVA film stripping process. (Ex: 458nm / Em: 480-520nm(Green) / Emission: 580-620nm(Red)) **(B)** 3D reconstructed confocal images.

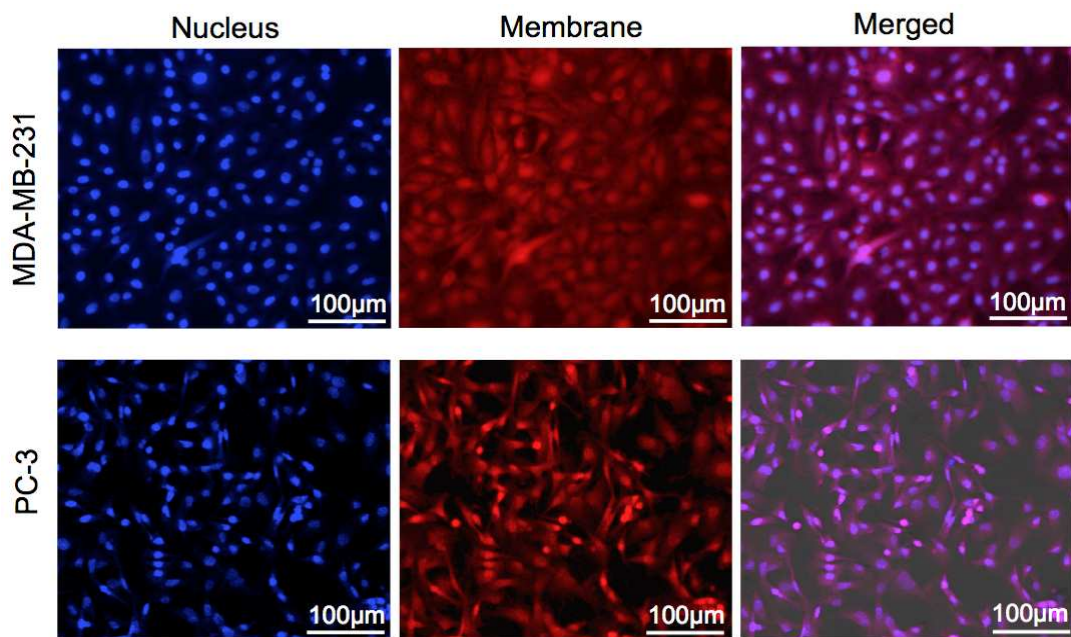

**Supporting Figure 3.** Nucleus and plasma membrane staining of fixed-PDMS transferred MDA-MB-231 breast cancer and PC-3 prostate cancer cells.

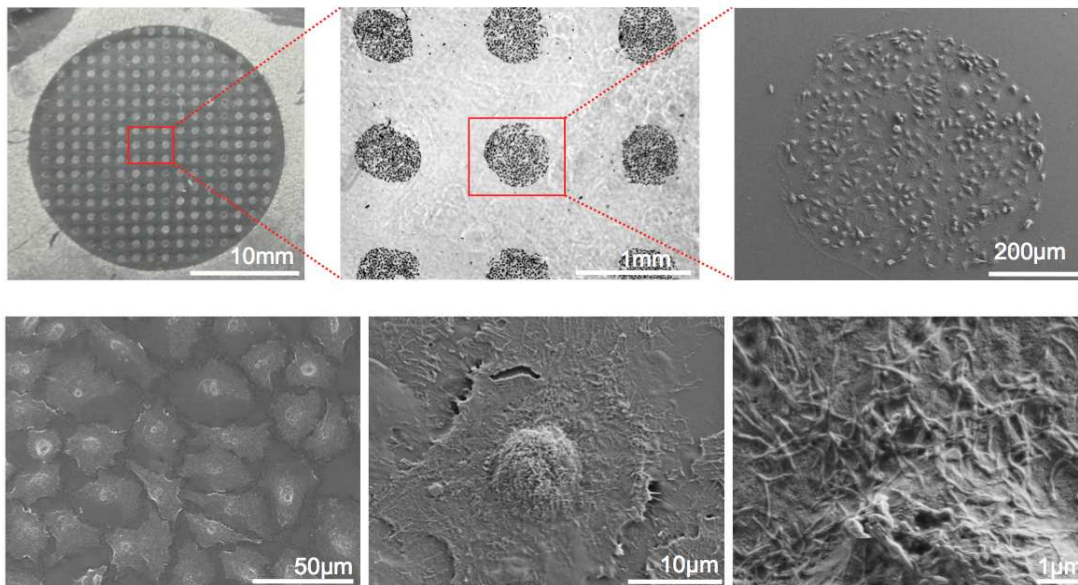

**Supporting Figure 4.** Fixed-PDMS transferred micro-patterned MDA-MB-231 breast cancer cells.
